# Supplementary material
Source: HighWire-hosted journal article supplement (https://bmjopen.bmj.com/content/8/5/e020594)
Supplement: inline-supplementary-material-1 [file inline-supplementary-material-1.pdf]

Search strategy and key words used :

1. **Antineoplastic agents OR Chemotherapy**

2. **Home Care OR Hospital At Home OR Home Care Services OR Home Infusion Therapy**

3. **Injection OR Infusion OR Perfusion OR Parenteral OR Intravenous OR Subcutaneous**

4. 1 AND 2 AND 3

5. ("Neoplasms"[Mesh] AND ("Antineoplastic Combined Chemotherapy Protocols"[Mesh] OR "Antineoplastic Agents"[Mesh])) AND ("Home Care Services"[Mesh] OR "Home Care Agencies"[Mesh])

6. **Injection AND 'Home care' AND 'Chemotherapy'**
